# Supplementary material for: Grafting transition metal–organophosphonate fragments onto heteropolyoxomolybdate: activity in photocatalysis
Source: Royal Society of Chemistry journal article supplement (doi:10.1039/c5dt02471d), 2015-01-01
Supplement: c5dt02471d1.pdf [file c5dt02471d1.pdf]

## Electronic Supplementary Information

### Grafting transition metal–organophosphonate fragments onto

### heteropolyoxomolybdate: activity in photocatalysis

Xiaopeng Sun, Zhijie Liang, Pengtao Ma, Ran Ban, Mingshuang Jiang, Dongdi Zhang,\*  
Jingping Wang and Jingyang Niu\*

Henan Key Laboratory of Polyoxometalate Chemistry,  
Institute of Molecular and Crystal Engineering,  
College of Chemistry and Chemical Engineering,  
Henan University, Kaifeng 475004, Henan, China,  
E-mail: ddzhang@henu.edu.cn, jyniu@henu.edu.cn; Fax: (+86)371-23886876.

#### CONTENTS

Section1. IR spectra of **1** and H<sub>3</sub>L

Section2. The comparison of experimental XRPD pattern and simulated of **1**

Section3. The synthetic pathway of **1**

Section4. Thermogravimetric analyses of **1**

Section5. Bond valence sum calculations of Mo, Ni, P and O atoms on POM fragments in **1**

Section6. Crystallographic data of **1**

Section7. Selected bond angles (°) of **1**

Section8. Some structural figures

Section9. Additional photocatalysis related table and figure

Section1. IR spectra of **1** and H<sub>3</sub>L

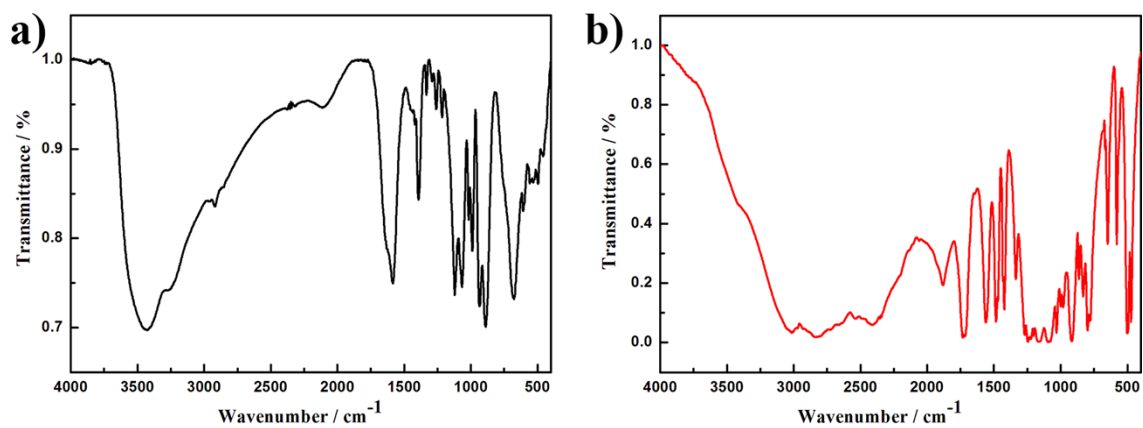

Fig. S1 IR spectra of **1** (a) and H<sub>3</sub>L (b)

Section2. The comparison of experimental XRPD pattern and simulated of **1**

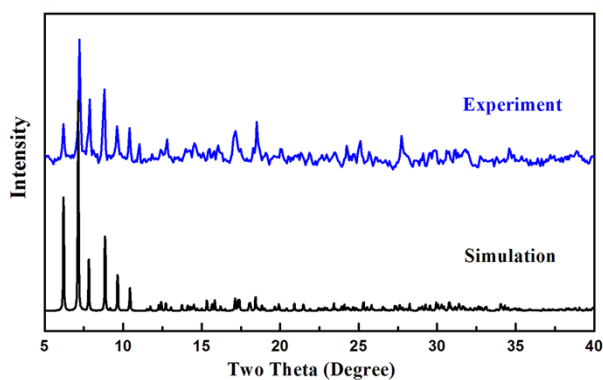

Fig. S2 The comparison of experimental XRPD patterns (blue) and simulated (black) of **1**

Section3. The synthetic pathway of **1**

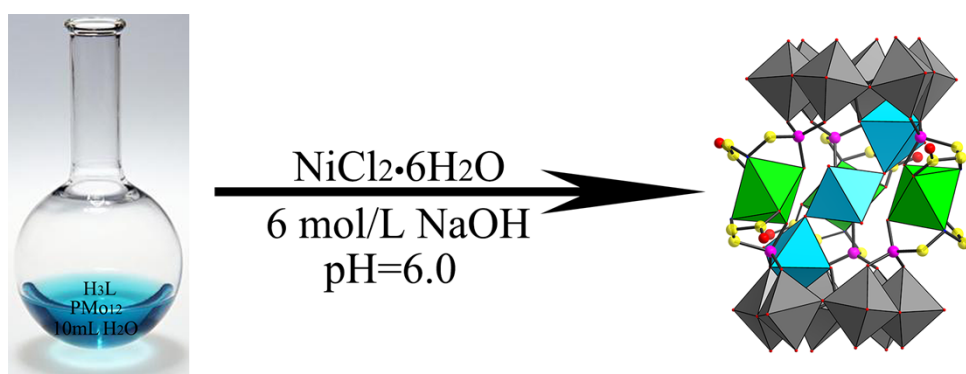

Fig. S3 The synthetic pathway of compound **1** with stirring approximately 2h at 80 °C

Section4. Thermogravimetric analyses of **1**

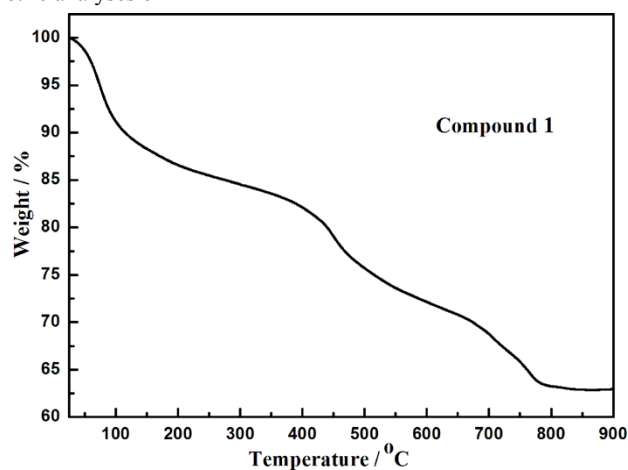

Fig. S4 Thermogravimetric analysis curve of **1**

Section5. Bond valence sum calculations of Mo, Ni, P and O atoms on POM fragments in **1**

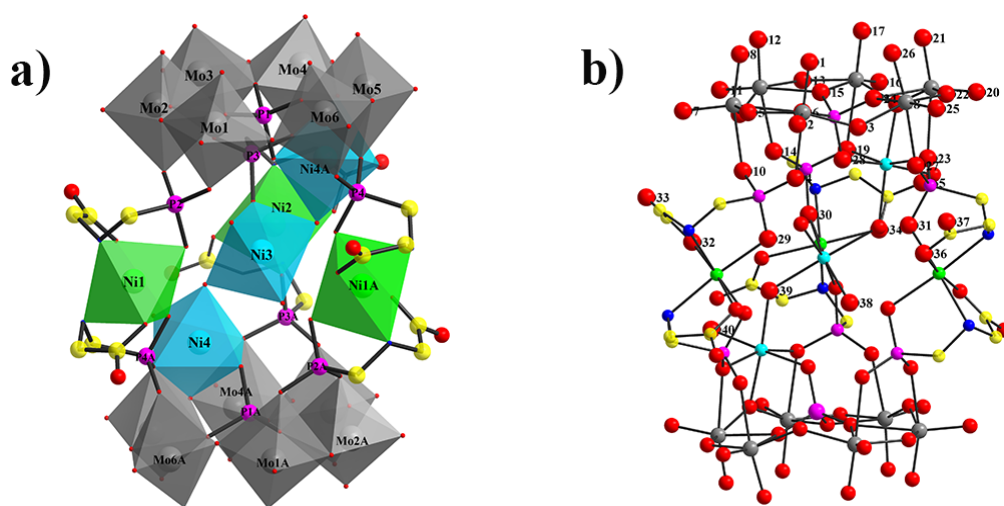

Fig. S5 The representation of Mo, Ni, P atoms (a), and O atoms (b) labeling in polyanion **1a**

Symmetry code; A: 2-x, y, 0.5-z.

Table S1 Bond valence sum parameters for Mo atoms on POM fragments in **1**

| Bond        | Bond length | Bond Valence | Valence Sum                  |
|-------------|-------------|--------------|------------------------------|
| Mo(1)-O(1)  | 1.710       | 1.703        | $\Sigma(\text{Mo1}) = 6.015$ |
| Mo(1)-O(2)  | 1.714       | 1.685        |                              |
| Mo(1)-O(5)  | 1.913       | 0.984        |                              |
| Mo(1)-O(3)  | 1.926       | 0.950        |                              |
| Mo(1)-O(4)  | 2.267       | 0.378        |                              |
| Mo(1)-O(6)  | 2.334       | 0.315        |                              |
| Mo(2)-O(7)  | 1.713       | 1.689        | $\Sigma(\text{Mo2}) = 6.024$ |
| Mo(2)-O(8)  | 1.714       | 1.685        |                              |
| Mo(2)-O(9)  | 1.914       | 0.981        |                              |
| Mo(2)-O(5)  | 1.938       | 0.920        |                              |
| Mo(2)-O(10) | 2.222       | 0.427        |                              |

|             |       |       |                              |
|-------------|-------|-------|------------------------------|
| Mo(2)–O(6)  | 2.326 | 0.322 |                              |
| Mo(3)–O(12) | 1.705 | 1.726 | $\Sigma(\text{Mo3}) = 6.051$ |
| Mo(3)–O(11) | 1.716 | 1.676 |                              |
| Mo(3)–O(9)  | 1.907 | 1.000 |                              |
| Mo(3)–O(13) | 1.944 | 0.905 |                              |
| Mo(3)–O(14) | 2.223 | 0.426 |                              |
| Mo(3)–O(15) | 2.330 | 0.319 |                              |
| Mo(4)–O(16) | 1.700 | 1.750 | $\Sigma(\text{Mo4}) = 6.037$ |
| Mo(4)–O(17) | 1.710 | 1.703 |                              |
| Mo(4)–O(13) | 1.879 | 1.079 |                              |
| Mo(4)–O(18) | 1.952 | 0.885 |                              |
| Mo(4)–O(15) | 2.318 | 0.329 |                              |
| Mo(4)–O(19) | 2.364 | 0.291 |                              |
| Mo(5)–O(21) | 1.694 | 1.778 | $\Sigma(\text{Mo5}) = 6.108$ |
| Mo(5)–O(20) | 1.704 | 1.731 |                              |
| Mo(5)–O(22) | 1.887 | 1.056 |                              |
| Mo(5)–O(18) | 1.959 | 0.869 |                              |
| Mo(5)–O(24) | 2.270 | 0.375 |                              |
| Mo(5)–O(23) | 2.353 | 0.300 |                              |
| Mo(6)–O(25) | 1.707 | 1.717 | $\Sigma(\text{Mo6}) = 6.041$ |
| Mo(6)–O(26) | 1.714 | 1.685 |                              |
| Mo(6)–O(3)  | 1.902 | 1.013 |                              |
| Mo(6)–O(22) | 1.948 | 0.895 |                              |
| Mo(6)–O(27) | 2.225 | 0.423 |                              |
| Mo(6)–O(24) | 2.344 | 0.307 |                              |

Bond valence sum parameters for Mo(1A), Mo(2A), Mo(3A), Mo(4A), Mo(5A) and Mo(6A) are the same as Mo(1), Mo(2), Mo(3), Mo(4), Mo(5) and Mo(6), so they are omitted.

**Table S2** Bond valence sum parameters for Ni atoms on POM fragments in **1**

| Bond         | Bond length | Bond Valence | Valence Sum                  |
|--------------|-------------|--------------|------------------------------|
| Ni(1)–O(32)  | 2.048       | 0.345        | $\Sigma(\text{Ni1}) = 2.029$ |
| Ni(1)–O(36A) | 2.054       | 0.339        |                              |
| Ni(1)–O(31A) | 2.088       | 0.309        |                              |
| Ni(1)–O(29)  | 2.092       | 0.306        |                              |
| Ni(1)–N(1)   | 2.106       | 0.382        |                              |
| Ni(1)–N(3A)  | 2.141       | 0.348        |                              |
| Ni(2)–O(34)  | 2.030       | 0.362        | $\Sigma(\text{Ni2}) = 2.128$ |
| Ni(2)–O(34A) | 2.030       | 0.362        |                              |
| Ni(2)–O(30)  | 2.081       | 0.315        |                              |
| Ni(2)–O(30A) | 2.080       | 0.316        |                              |
| Ni(2)–N(2A)  | 2.102       | 0.386        |                              |
| Ni(2)–N(2)   | 2.102       | 0.386        |                              |
| Ni(3)–O(38A) | 2.024       | 0.368        |                              |

|              |       |       |                              |
|--------------|-------|-------|------------------------------|
| Ni(3)–O(38)  | 2.024 | 0.368 | $\Sigma(\text{Ni}3) = 1.952$ |
| Ni(3)–O(30A) | 2.054 | 0.339 |                              |
| Ni(3)–O(30)  | 2.054 | 0.339 |                              |
| Ni(3)–O(39A) | 2.140 | 0.269 |                              |
| Ni(3)–O(39)  | 2.140 | 0.269 |                              |
| Ni(4)–O(23A) | 2.034 | 0.358 | $\Sigma(\text{Ni}4) = 1.958$ |
| Ni(4)–O(19A) | 2.036 | 0.356 |                              |
| Ni(4)–O(18A) | 2.057 | 0.336 |                              |
| Ni(4)–O(40)  | 2.084 | 0.313 |                              |
| Ni(4)–O(28A) | 2.101 | 0.299 |                              |
| Ni(4)–O(39)  | 2.105 | 0.296 |                              |

Bond valence sum parameters for Ni(1A) and Ni(4A) are the same as Ni(1) and Ni(4), so they are omitted.

**Table S3** Bond valence sum parameters for P atoms on POM fragments in **1**

| Bond       | Bond length | Bond Valence | Valence Sum                 |
|------------|-------------|--------------|-----------------------------|
| P(1)–O(28) | 1.520       | 1.300        | $\Sigma(\text{P}1) = 4.918$ |
| P(1)–O(6)  | 1.542       | 1.225        |                             |
| P(1)–O(15) | 1.550       | 1.199        |                             |
| P(1)–O(24) | 1.551       | 1.195        |                             |
| P(2)–O(4)  | 1.526       | 1.279        | $\Sigma(\text{P}2) = 2.658$ |
| P(2)–O(10) | 1.527       | 1.275        |                             |
| P(2)–O(29) | 1.535       | 1.248        |                             |
| P(2)–C(1)  | 1.800       | 1.145        |                             |
| P(3)–O(14) | 1.517       | 1.310        | $\Sigma(\text{P}3) = 2.736$ |
| P(3)–O(30) | 1.524       | 1.286        |                             |
| P(3)–O(19) | 1.535       | 1.248        |                             |
| P(3)–C(4)  | 1.812       | 1.108        |                             |
| P(4)–O(27) | 1.512       | 1.328        | $\Sigma(\text{P}4) = 2.720$ |
| P(4)–O(31) | 1.526       | 1.279        |                             |
| P(4)–O(23) | 1.535       | 1.248        |                             |
| P(4)–C(7)  | 1.803       | 1.135        |                             |

Bond valence sum parameters for P(1A), P(2A), P(3A) and P(4A) are the same as P(1), P(2), P(3) and P(4), so they are omitted.

**Table S4** Bond valence sum parameters for O atoms on POM fragments in **1**

| Atom | Valence Sum | Atom | Valence Sum |
|------|-------------|------|-------------|
| O1   | 1.703       | O21  | 1.778       |
| O2   | 1.685       | O22  | 1.951       |
| O3   | 1.964       | O23  | 1.906       |
| O4   | 1.657       | O24  | 1.877       |
| O5   | 1.904       | O25  | 1.717       |
| O6   | 1.862       | O26  | 1.685       |
| O7   | 1.689       | O27  | 1.752       |

|     |       |     |       |
|-----|-------|-----|-------|
| O8  | 1.685 | O28 | 1.598 |
| O9  | 1.981 | O29 | 1.554 |
| O10 | 1.702 | O30 | 1.940 |
| O11 | 1.676 | O31 | 1.588 |
| O12 | 1.726 | O32 | 1.861 |
| O13 | 1.983 | O33 | 1.575 |
| O14 | 1.736 | O34 | 1.712 |
| O15 | 1.847 | O35 | 1.429 |
| O16 | 1.750 | O36 | 1.715 |
| O17 | 1.703 | O37 | 1.541 |
| O18 | 2.091 | O38 | 0.368 |
| O19 | 1.895 | O39 | 0.564 |
| O20 | 1.731 | O40 | 0.313 |

$\Sigma(O38) = 0.368 \rightarrow \text{OH2}$   $\Sigma(O39) = 0.564 \rightarrow \text{OH2}$   $\Sigma(O40) = 0.313 \rightarrow \text{OH2}$ ;

Bond valence sum parameters for O(1A), O(2A), O(3A).....O(40A) are the same as O(1), O(2), O(3).....O(40), so they are omitted.

#### Section6. Crystallographic data for **1**

**Table S5** Crystallographic data for **1**

|                                                          |                                                                                                      |
|----------------------------------------------------------|------------------------------------------------------------------------------------------------------|
| Empirical formula                                        | $\text{C}_{18}\text{H}_{86}\text{CsMo}_{12}\text{N}_6\text{Na}_9\text{Ni}_6\text{O}_{101}\text{P}_8$ |
| Formula weight                                           | 4094.04                                                                                              |
| T [K]                                                    | 296.15                                                                                               |
| Space group                                              | <i>C2/c</i>                                                                                          |
| Crystal system                                           | Monoclinic                                                                                           |
| <i>a</i> [Å]                                             | 14.8247(8)                                                                                           |
| <i>b</i> [Å]                                             | 45.237(2)                                                                                            |
| <i>c</i> [Å]                                             | 18.8324 (9)                                                                                          |
| $\beta$ [°]                                              | 103.371(10)                                                                                          |
| V [Å <sup>3</sup> ]                                      | 12287.1(11)                                                                                          |
| Z                                                        | 4                                                                                                    |
| Crystal size [mm <sup>3</sup> ]                          | 0.50 x 0.18 x 0.17                                                                                   |
| $\rho_{\text{calc}}$ [g cm <sup>-3</sup> ]               | 2.213                                                                                                |
| $\mu$ [mm <sup>-1</sup> ]                                | 2.617                                                                                                |
| F(000)                                                   | 7960.0                                                                                               |
| Limiting indices                                         | $-17 \leq h \leq 17$<br>$-45 \leq k \leq 53$<br>$-22 \leq l \leq 22$                                 |
| 2 $\theta$ for data collection [°]                       | 2.964 – 49.998                                                                                       |
| Reflections collected / unique                           | 31456 / 10802                                                                                        |
| $R_{\text{int}}$                                         | 0.0274                                                                                               |
| Goodness-of-fit on F <sup>2</sup>                        | 1.048                                                                                                |
| Final <i>R</i> indices [ $I > 2\sigma(I)$ ] <sup>a</sup> | $R_1 = 0.0439$ $wR_2 = 0.1332$                                                                       |
| Final <i>R</i> indices (all data) <sup>b</sup>           | $R_1 = 0.0554$ $wR_2 = 0.1445$                                                                       |

Note: <sup>a</sup> $R_1 = \sum ||F_o| - |F_c|| / \sum |F_o|$ ; <sup>b</sup> $wR_2 = [\sum w(F_o^2 - F_c^2)^2 / \sum w(F_o^2)^2]^{1/2}$

Section7. Selected bond angles (°) of **1**

**Table S6** Selected bond angles (°) of **1**

|                   |           |                    |            |                    |            |
|-------------------|-----------|--------------------|------------|--------------------|------------|
| O(1)-Mo(1)-O(2)   | 103.8(3)  | O(1)-Mo(1)-O(4)    | 166.2(2)   | O(5)-Mo(1)-O(6)    | 73.85(18)  |
| O(7)-Mo(2)-O(8)   | 103.8(3)  | O(7)-Mo(2)-O(6)    | 166.0(2)   | O(5)-Mo(2)-O(6)    | 73.6(18)   |
| O(12)-Mo(3)-O(11) | 102.9(3)  | O(12)-Mo(3)-O(14)  | 167.3(3)   | O(13)-Mo(3)-O(15)  | 72.65(18)  |
| O(16)-Mo(4)-O(17) | 103.9(3)  | O(16)-Mo(4)-O(15)  | 166.4(2)   | O(18)-Mo(4)-O(19)  | 74.75(17)  |
| O(21)-Mo(5)-O(20) | 102.5(3)  | O(20)-Mo(5)-O(24)  | 166.1(2)   | O(18)-Mo(5)-O(23)  | 74.21(17)  |
| O(25)-Mo(6)-O(3)  | 102.8(3)  | O(26)-Mo(6)-O(27)  | 167.7(2)   | O(22)-Mo(6)-O(24)  | 72.09(18)  |
| O(32)-Ni(1)-O(29) | 92.41(19) | O(32)-Ni(1)-N(1)   | 82.1(2)    | O(29)-Ni(1)-N(1)   | 87.5(2)    |
| O(34)-Ni(2)-O(30) | 95.5(2)   | O(34)-Ni(2)-N(2)   | 81.7(2)    | O(30)-Ni(2)-N(2)   | 88.8(2)    |
| O(38)-Ni(3)-O(30) | 166.8(2)  | O(38)-Ni(3)-O(39)  | 87.32(19)  | O(30)-Ni(3)-O(39)  | 100.92(18) |
| O(40)-Ni(4)-O(39) | 87.3(2)   | O(19A)-Ni(4)-O(39) | 101.52(18) | O(18A)-Ni(4)-O(39) | 176.17(19) |

Section8. Some structural figures

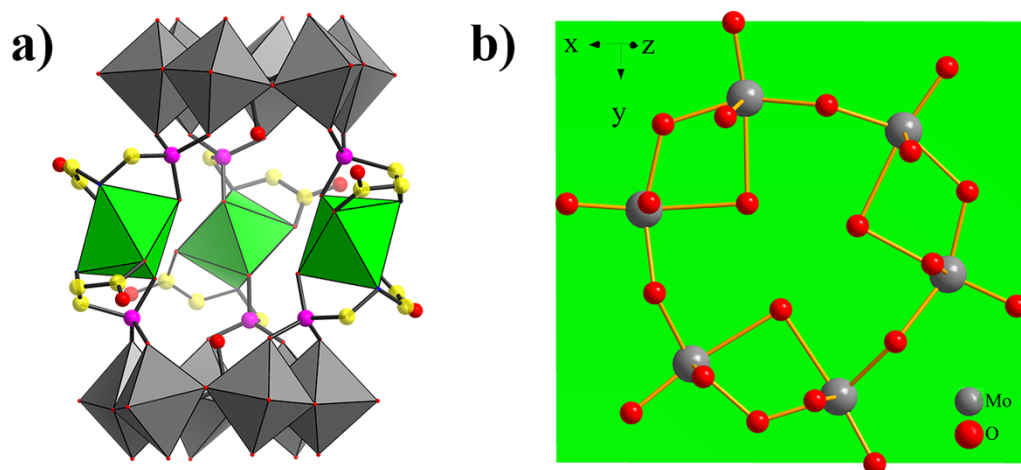

**Fig. S6** (a) Polyhedral / ball-and-stick representation of  $\{(PMo_6O_{22})_2(NiL_2)_3\}$  ( $L = OOCCH_2NHCH_2PO_3$ ); (b) The structure representation of  $\{Mo_6\}$  plane

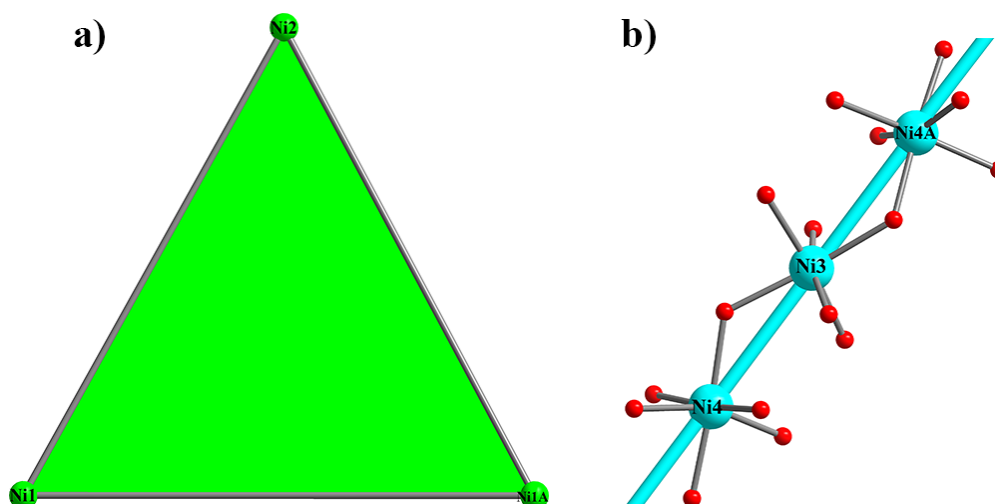

**Fig. S7** (a) The normative isosceles triangle constructed by Ni1, Ni1A and Ni2 atoms; (b) The Ni4–Ni3–Ni4A line with the angle of 174.96°

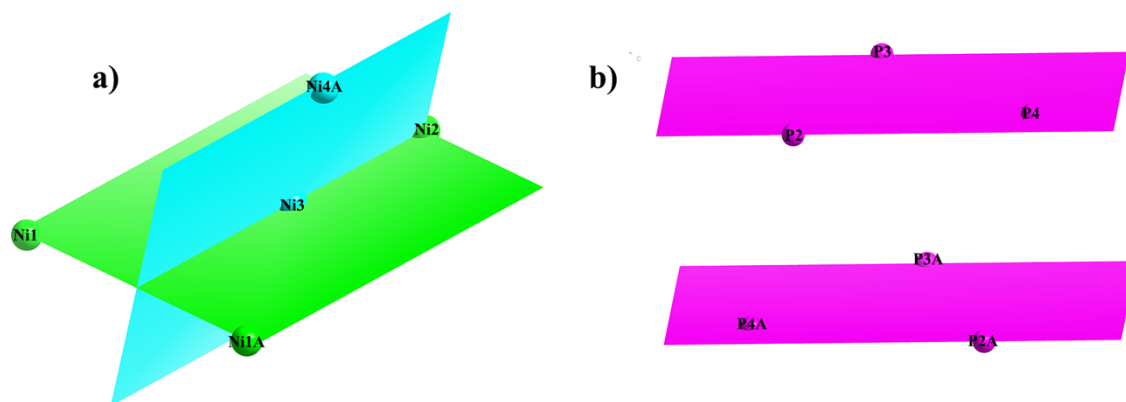

**Fig. S8** (a) The dihedral plane angle 56.12° of the two planes formed by Ni1, Ni2, Ni1A and Ni3, Ni4, Ni4A; (b) The nearly paralleled planes between P2, P3, P4 and P2A, P3A, P4A with the dihedral plane angle 0.10°

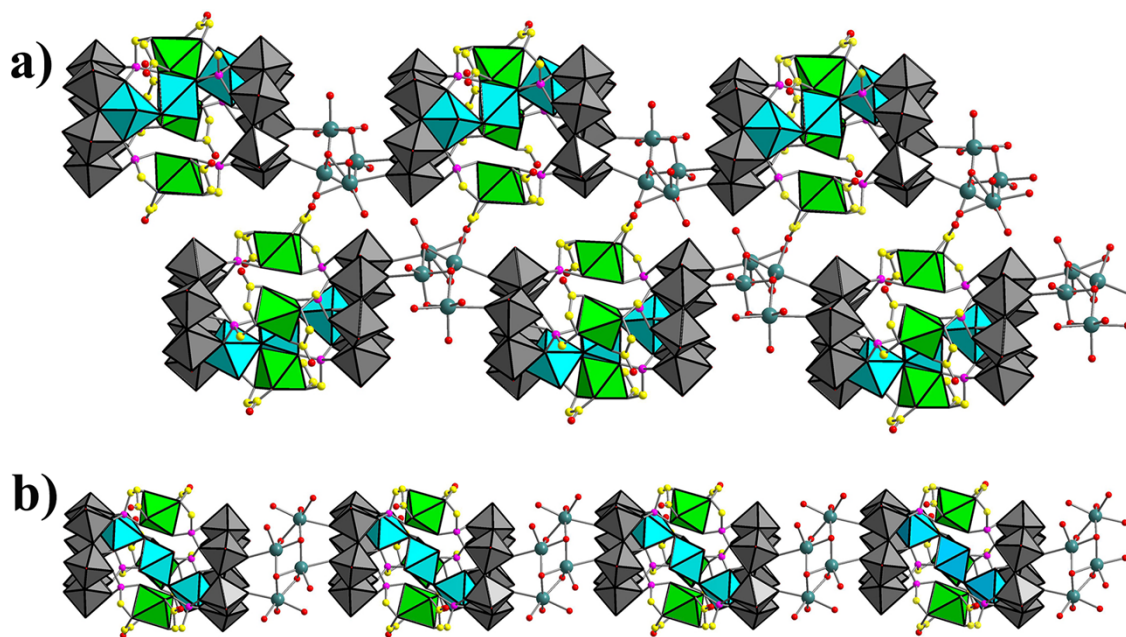

**Fig. S9** (a) The 1D double-chain structure formed from {Na<sub>4</sub>O<sub>16</sub>} bridge; (b) One branch structure of the 1D double-chain. Color code: {MoO<sub>6</sub>}: grey octahedral; {NiO<sub>4</sub>N<sub>2</sub>}: green octahedral; {NiO<sub>6</sub>}: sky blue octahedral; P: pink ball; N: blue ball; C: yellow ball; O: red ball; Na: teal ball; The H atoms are omitted for clarity.



Section9. Additional photocatalysis related table and figure

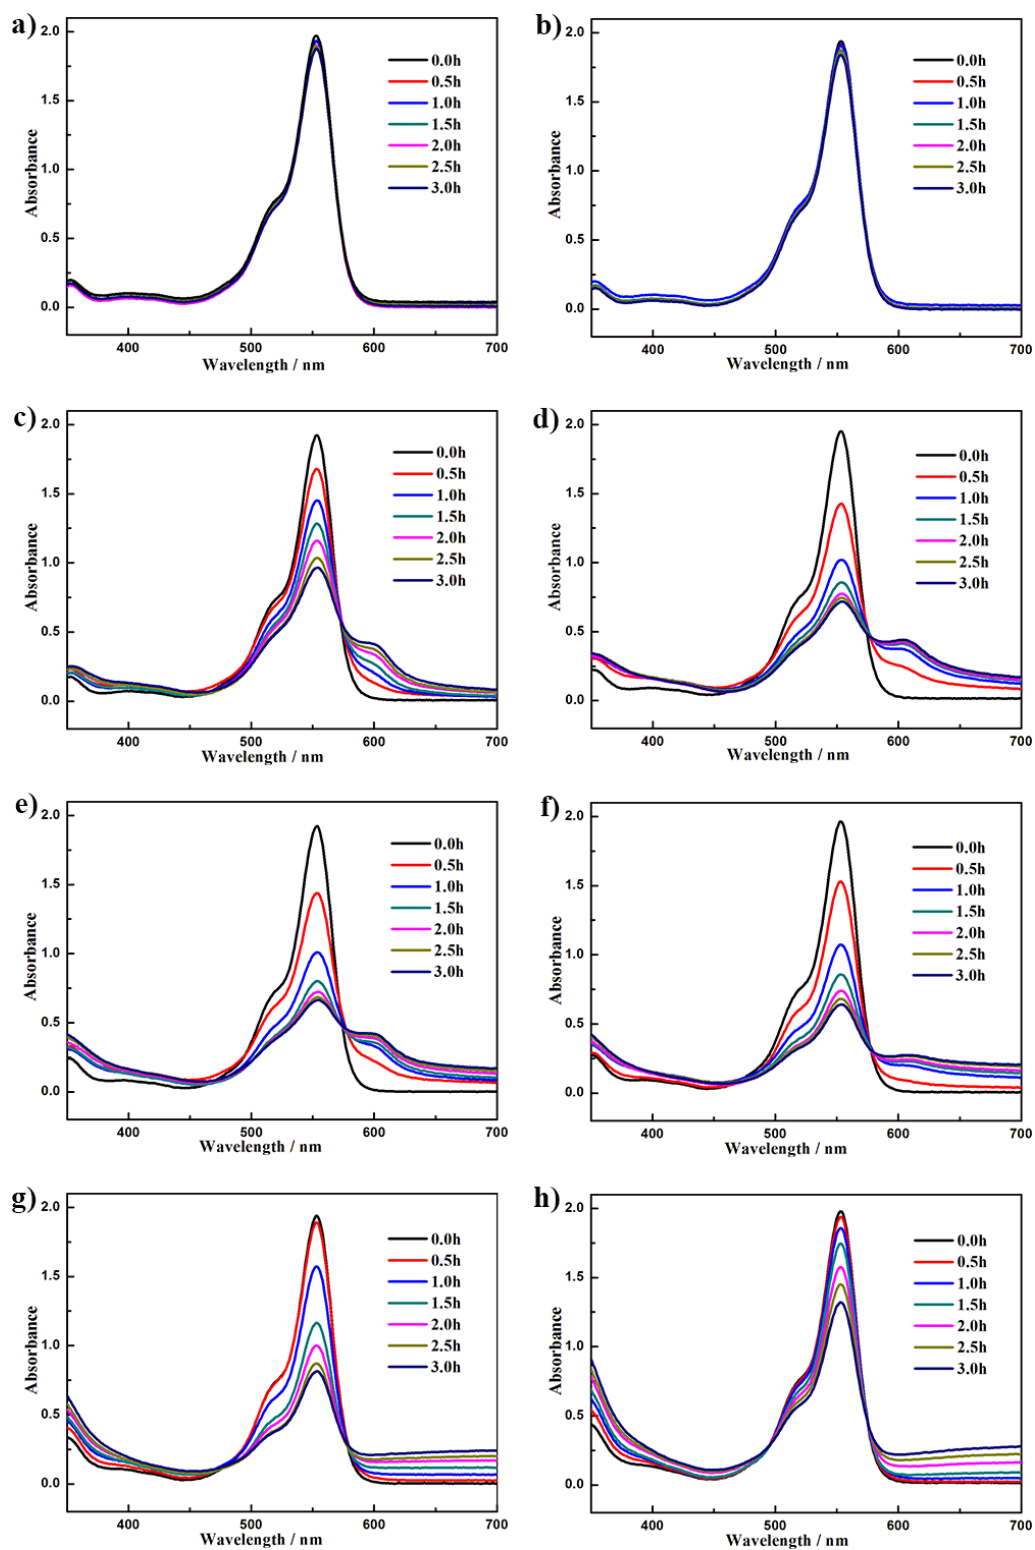

**Fig. S10** Absorption spectra of the Rhodamine B (RhB) aqueous solutions ( $2.0 \times 10^{-5} \text{ mol L}^{-1}$ ) during the photodegradation under 500 W Xe-lamp irradiation in the presence of **1** with 0 (a);  $6.4 \times 10^{-7}$  (b);  $1.28 \times 10^{-6}$  (c);  $2.56 \times 10^{-6}$  (d);  $3.84 \times 10^{-6}$  (e);  $5.12 \times 10^{-6}$  (f);  $1.02 \times 10^{-5}$  (g) and  $2.05 \times 10^{-5} \text{ mol L}^{-1}$  (h).

**Table S7** The photocatalytic degradation rates for RhB aqueous solutions of **1**

|                                               |       |       |       |       |
|-----------------------------------------------|-------|-------|-------|-------|
| The usage amount of <b>1</b> ( $10^{-6}$ mol) | 0     | 0.64  | 1.28  | 2.56  |
| Degradation rate (%)                          | 3.14  | 5.15  | 49.91 | 63.20 |
| The usage amount of <b>1</b> ( $10^{-6}$ mol) | 3.84  | 5.12  | 10.2  | 20.5  |
| Degradation rate (%)                          | 65.52 | 67.41 | 58.01 | 33.15 |
